# Supplementary material for: Deep learning approach to peripheral leukocyte recognition
Source: PubMed Central journal article supplement (PMC6592546; doi:10.1371/journal.pone.0218808), 2019-06-25
Supplement: pone.0218808.s001.pdf [file pone.0218808.s001.pdf]

**S1 Fig. Selected leukocyte recognition examples using SSD300×300\_Smin=0.2 and YOLOv3\_320×320 detection models.** We show detection results below with the highest confidence scores and intersection over union (IoU) value higher than 0.5. (A)-(M) show the detection results of blast, promyelocyte, myelocyte, metamyelocyte, band neutrophil, segmented neutrophil, lymphocyte, monocyte, reactive lymphocyte, small cells (NRBC) and dense scenes using SSD300×300\_Smin=0.2 model respectively while (N)-(Z) show that using YOLOv3\_320×320 model.

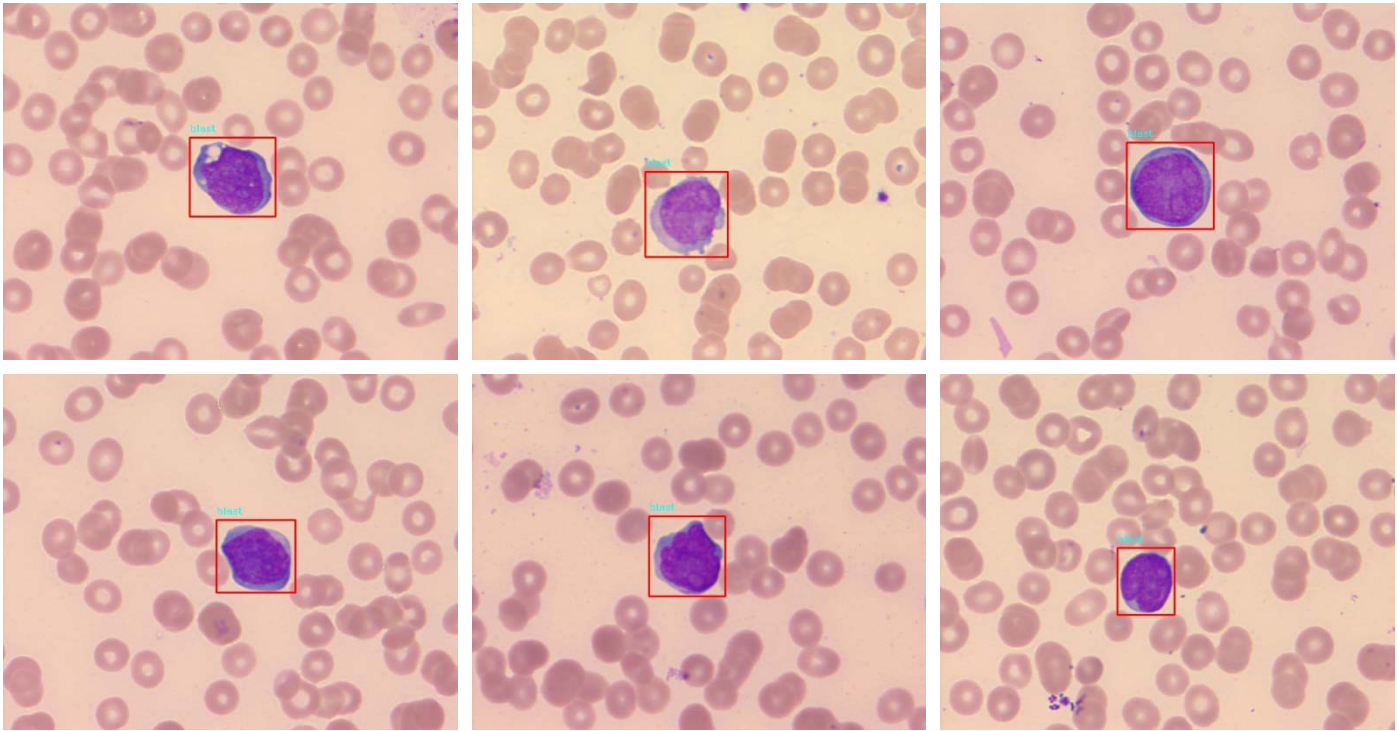

(A) detection results of blast using SSD300×300\_Smin=0.2 model

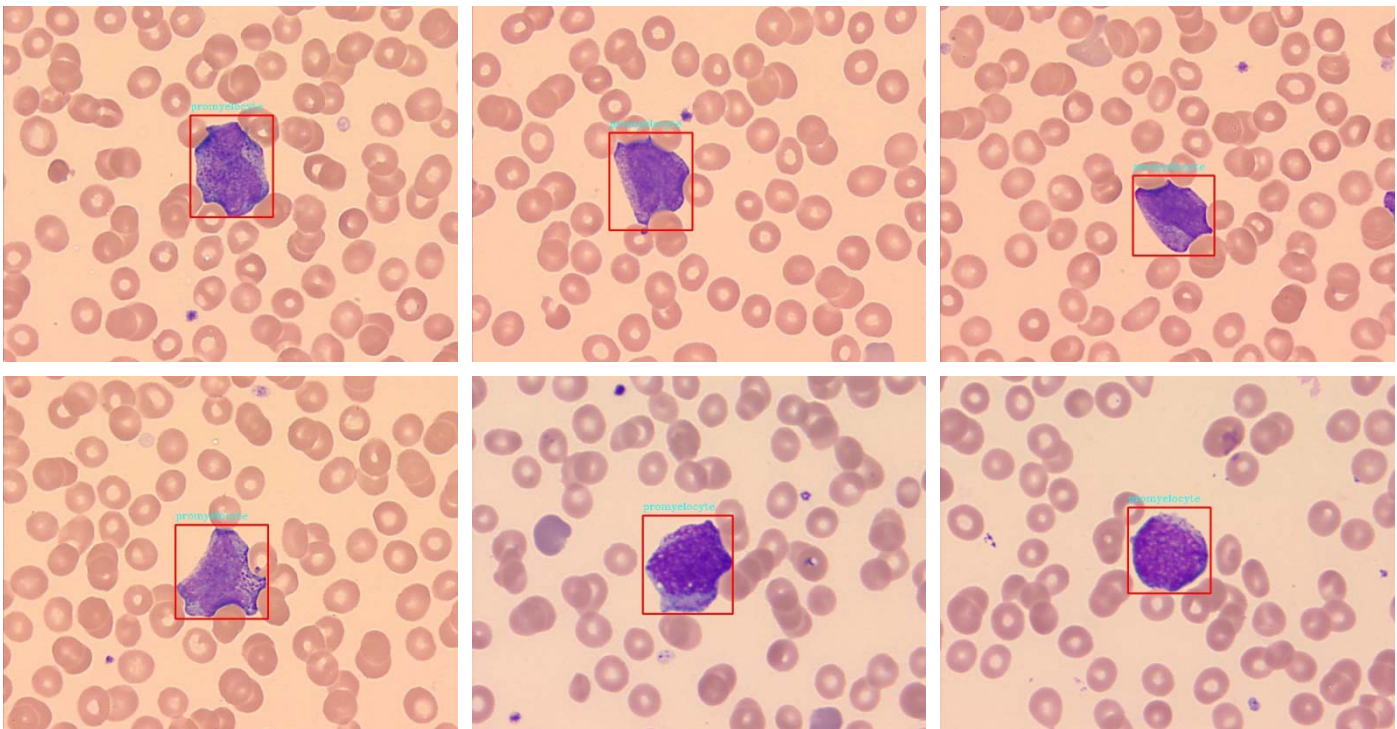

(B) detection results of promyelocyte using SSD300×300\_Smin=0.2 model

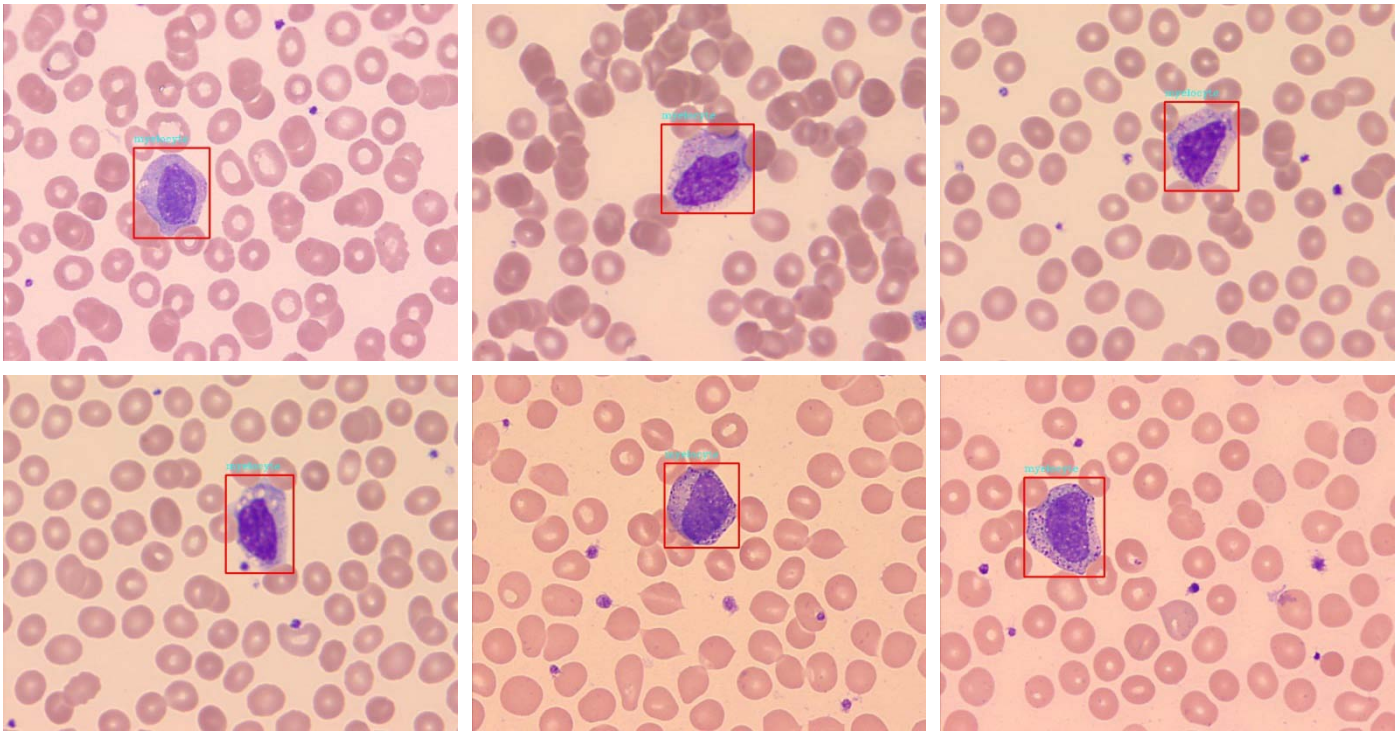

(C) detection results of myelocyte using SSD300×300\_Smin=0.2 model

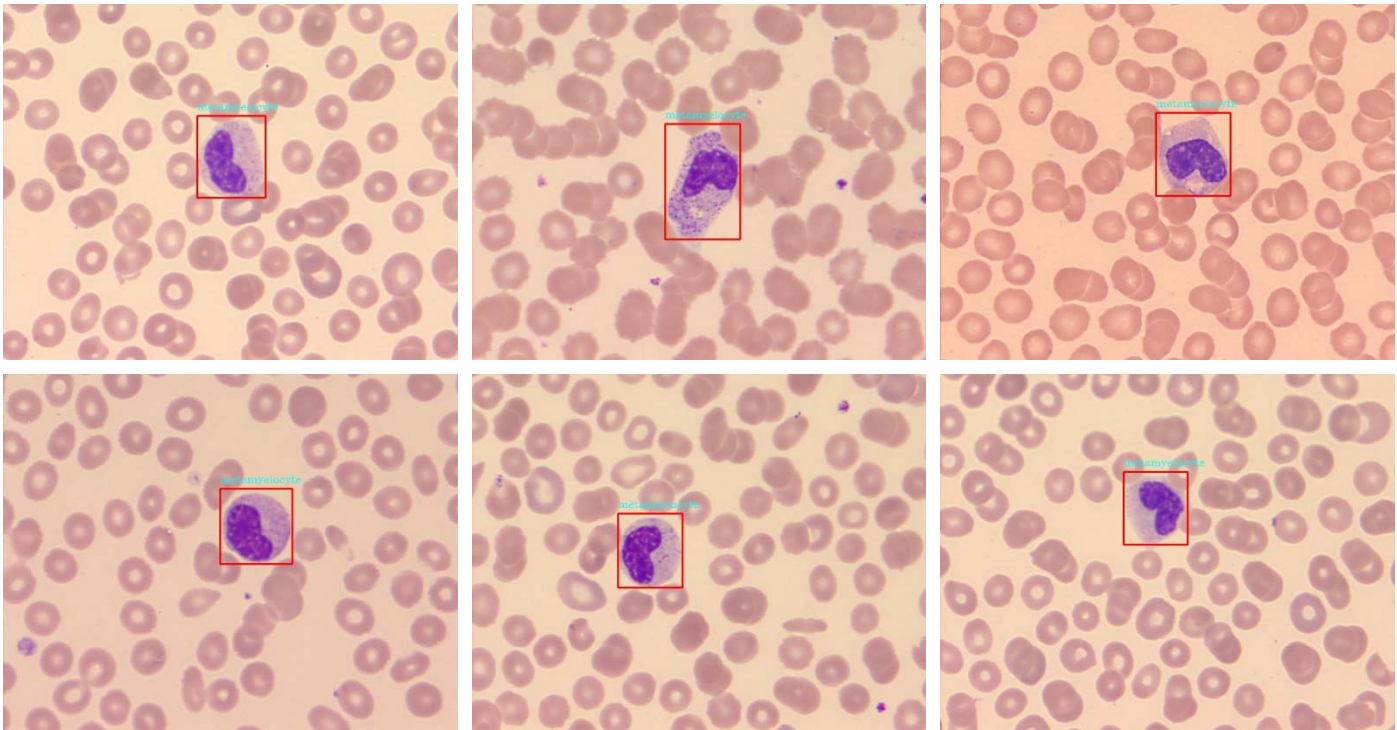

(D) detection results of metamyelocyte using SSD300×300\_Smin=0.2 model

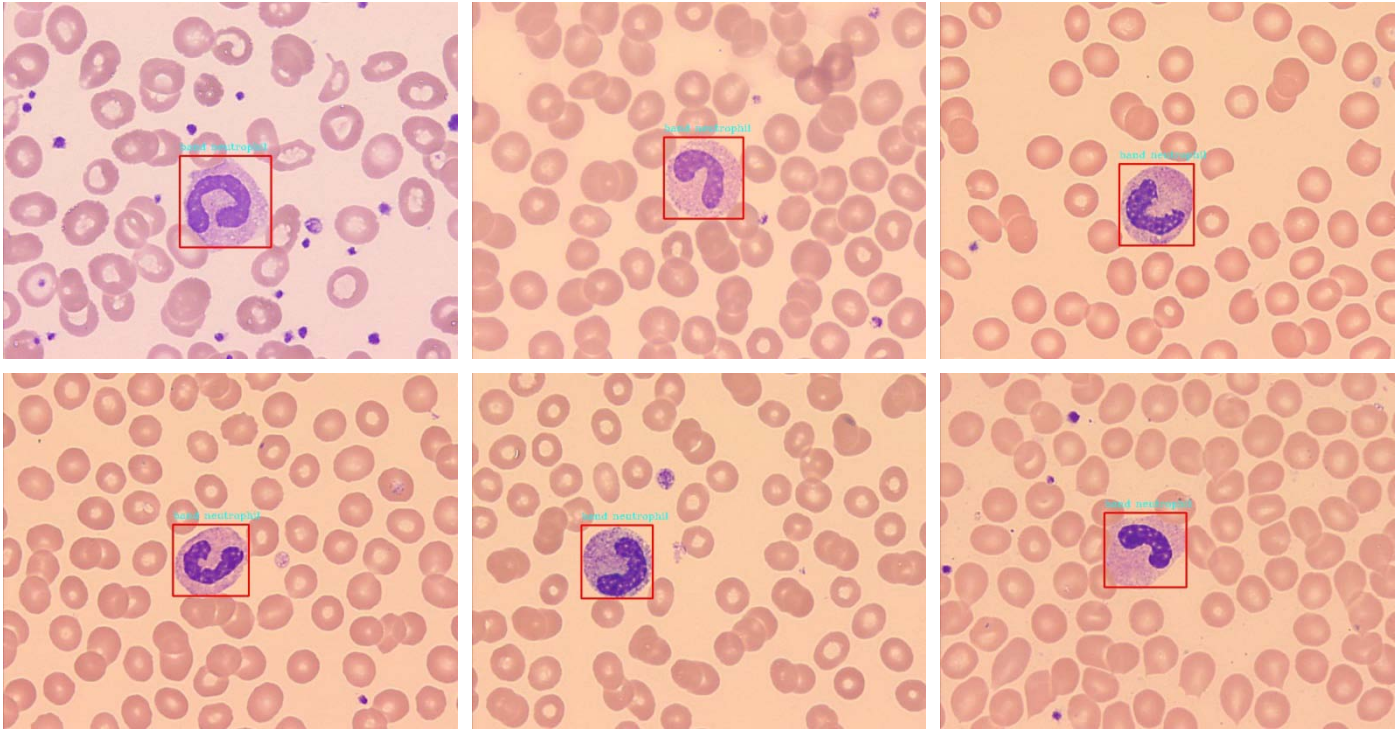

(E) detection results of band neutrophil using SSD300×300\_Smin=0.2 model

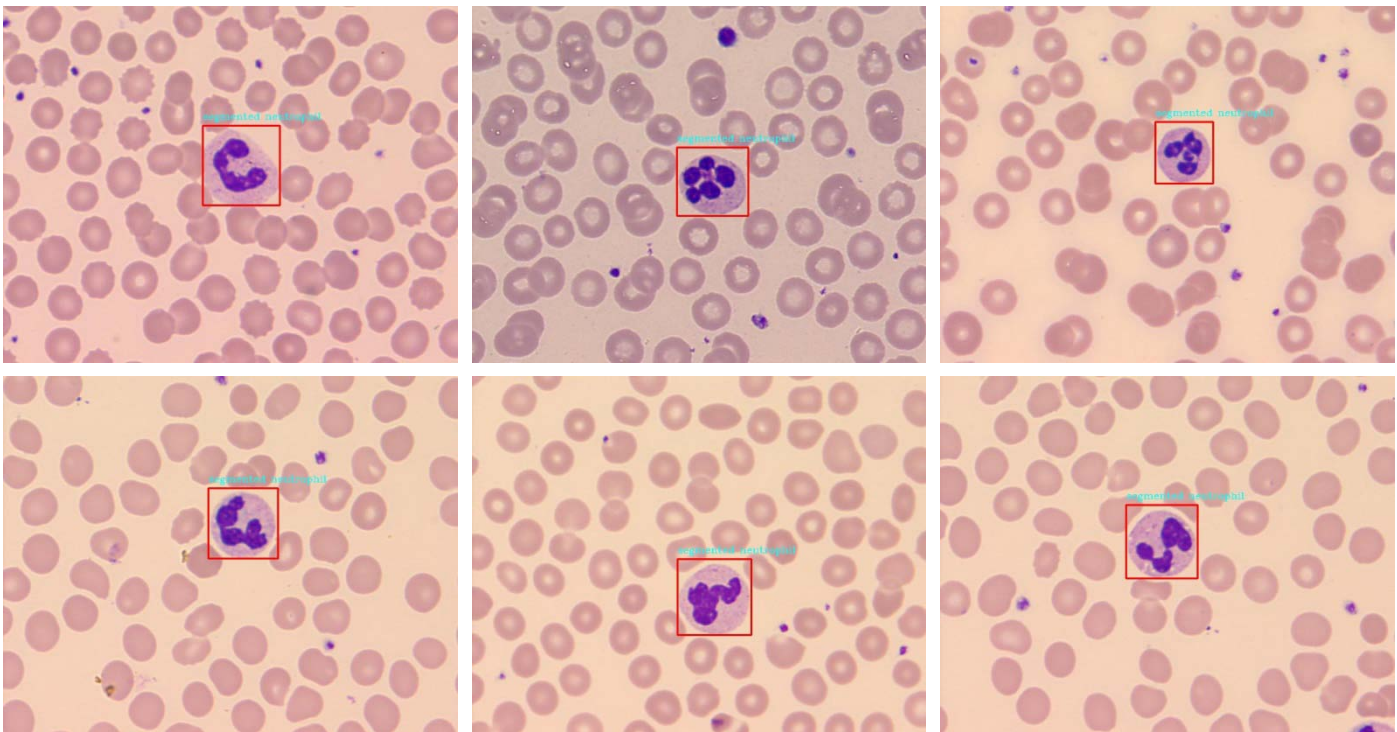

(F) detection results of segmented neutrophil using SSD300×300\_Smin=0.2 model

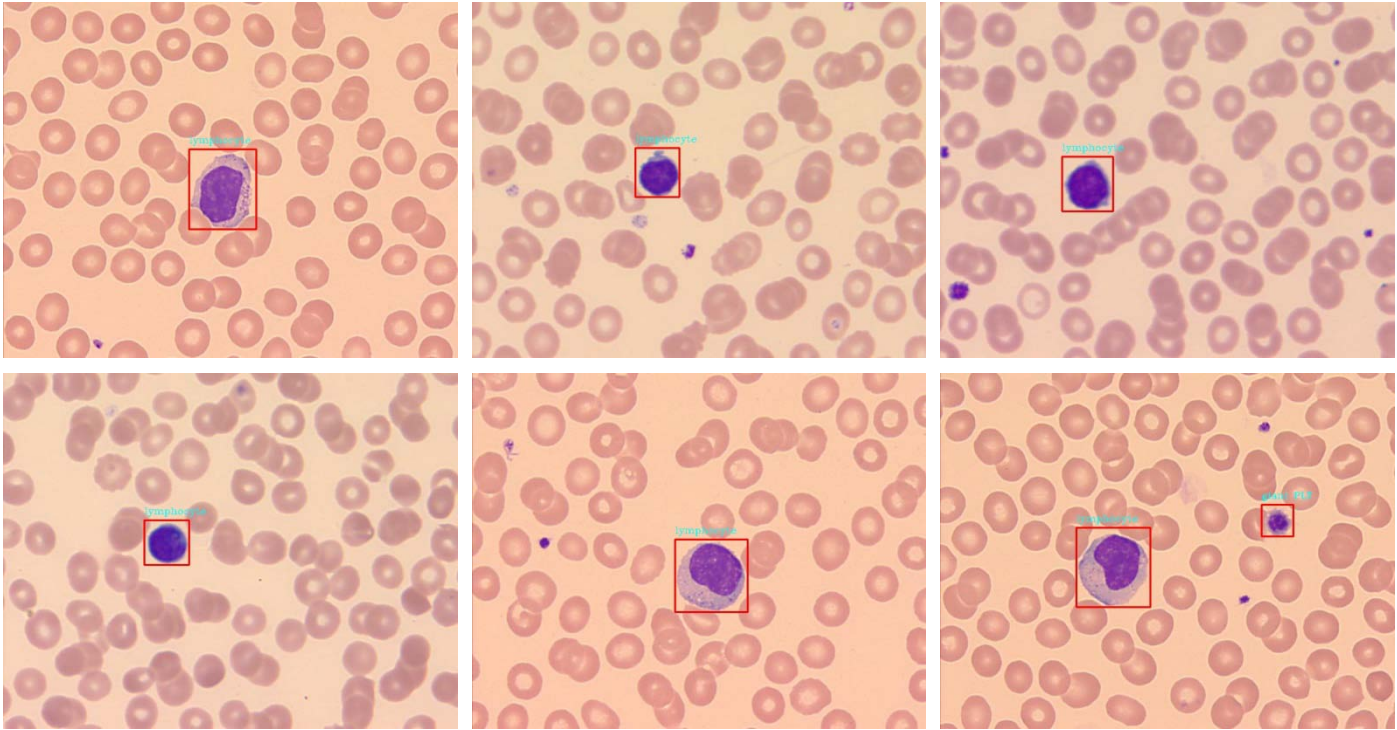

(G) detection results of lymphocyte using SSD300×300\_Smin=0.2 model

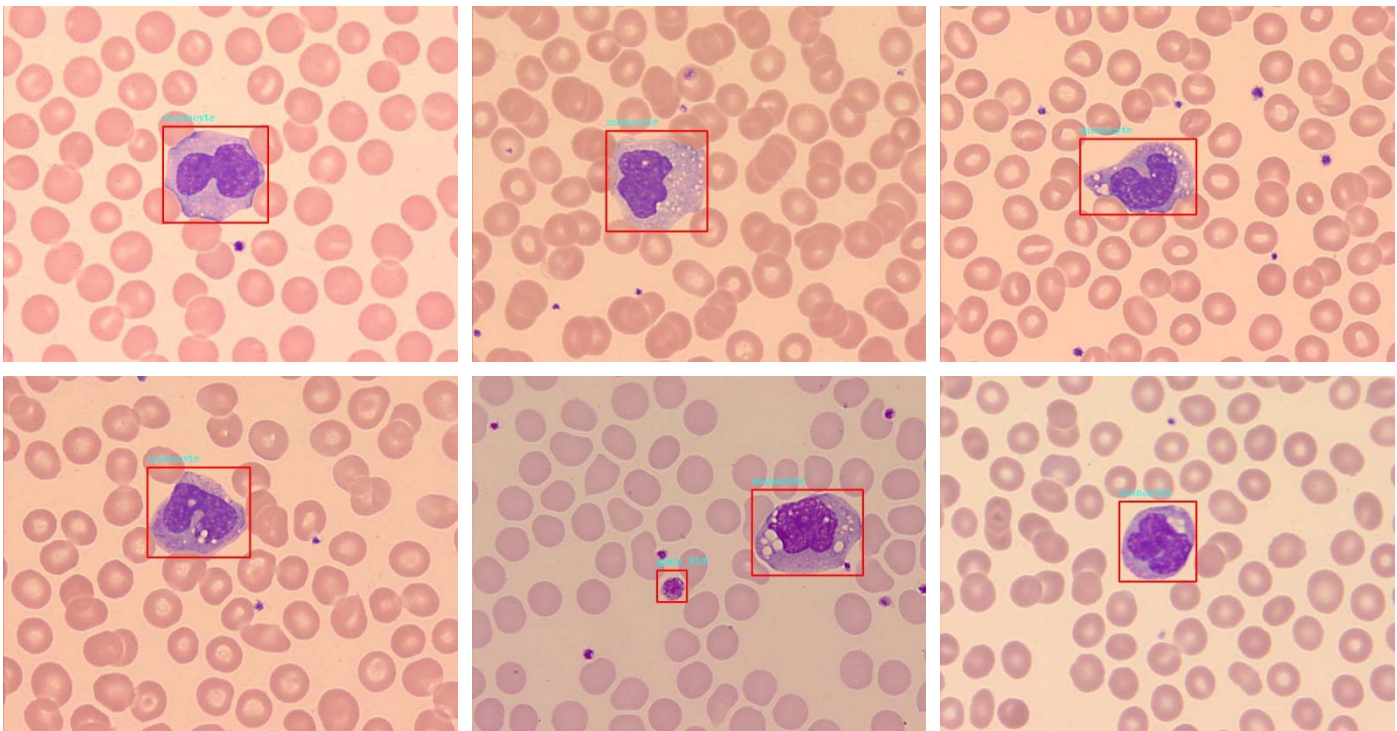

(H) detection results of monocyte using SSD300×300\_Smin=0.2 model

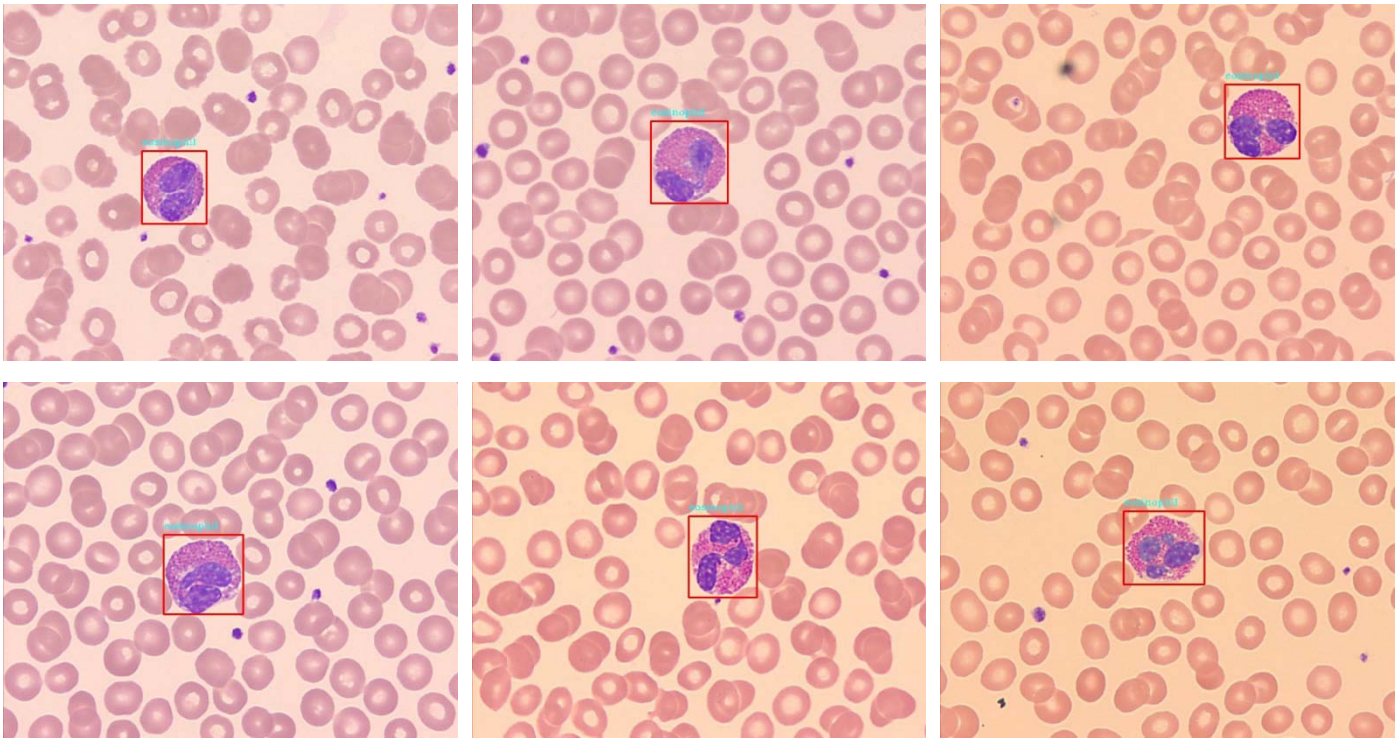

(I) detection results of eosinophil using SSD300×300\_Smin=0.2 model

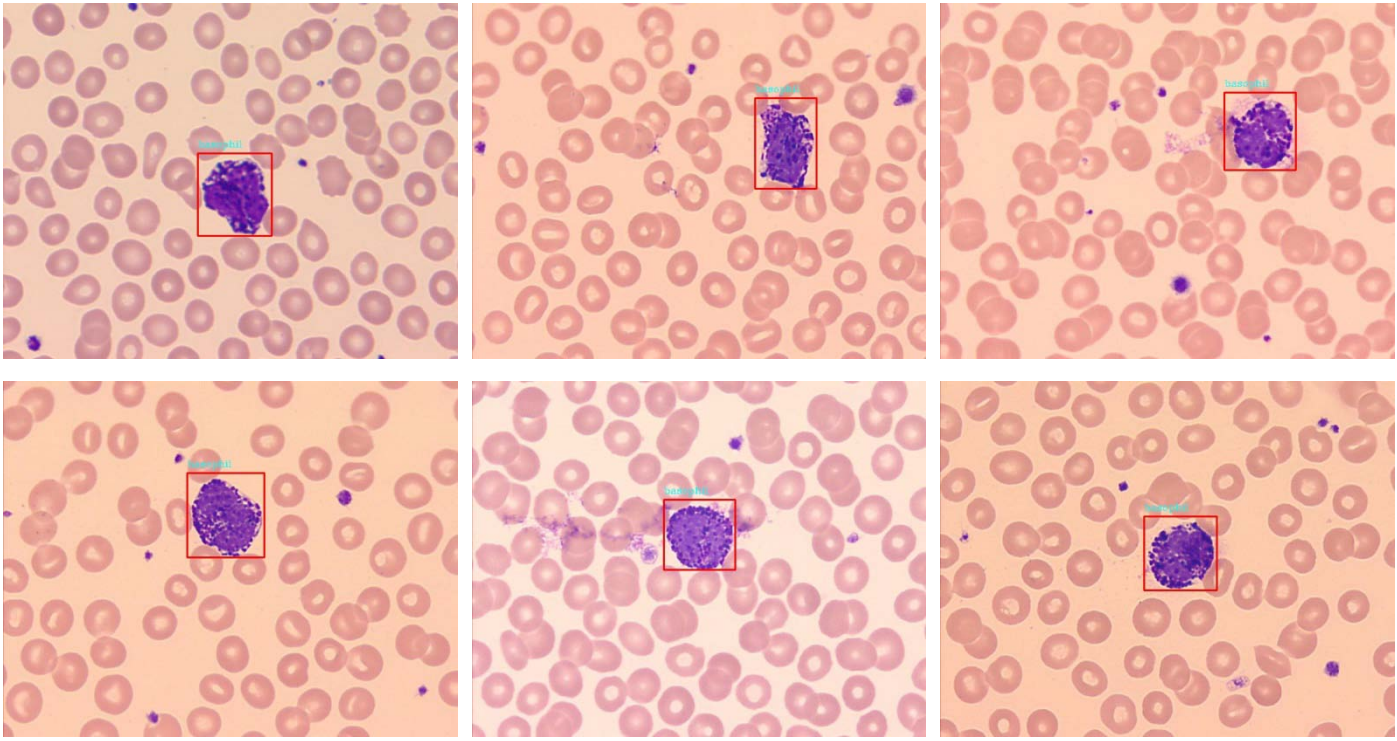

(J) detection results of basophil using SSD300×300\_Smin=0.2 model

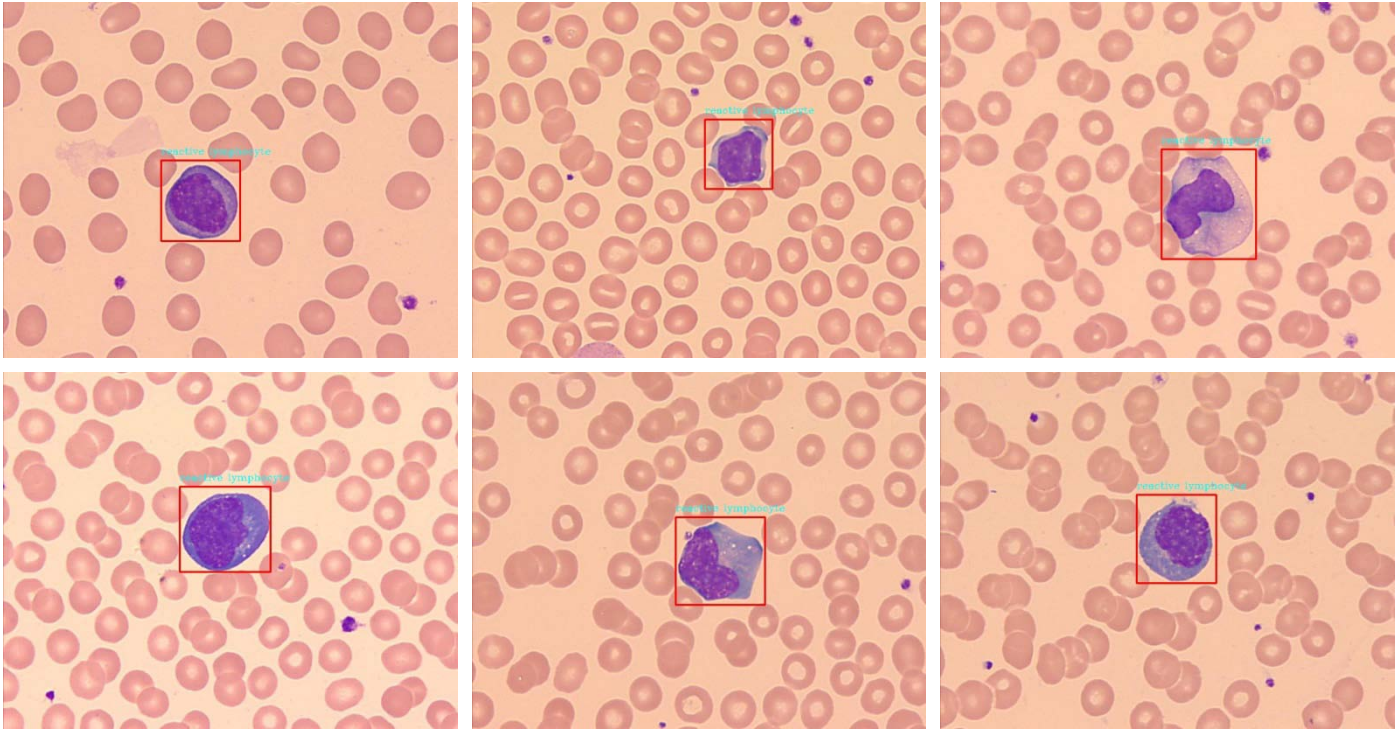

(K) detection results of reactive lymphocyte using SSD300×300\_Smin=0.2 model

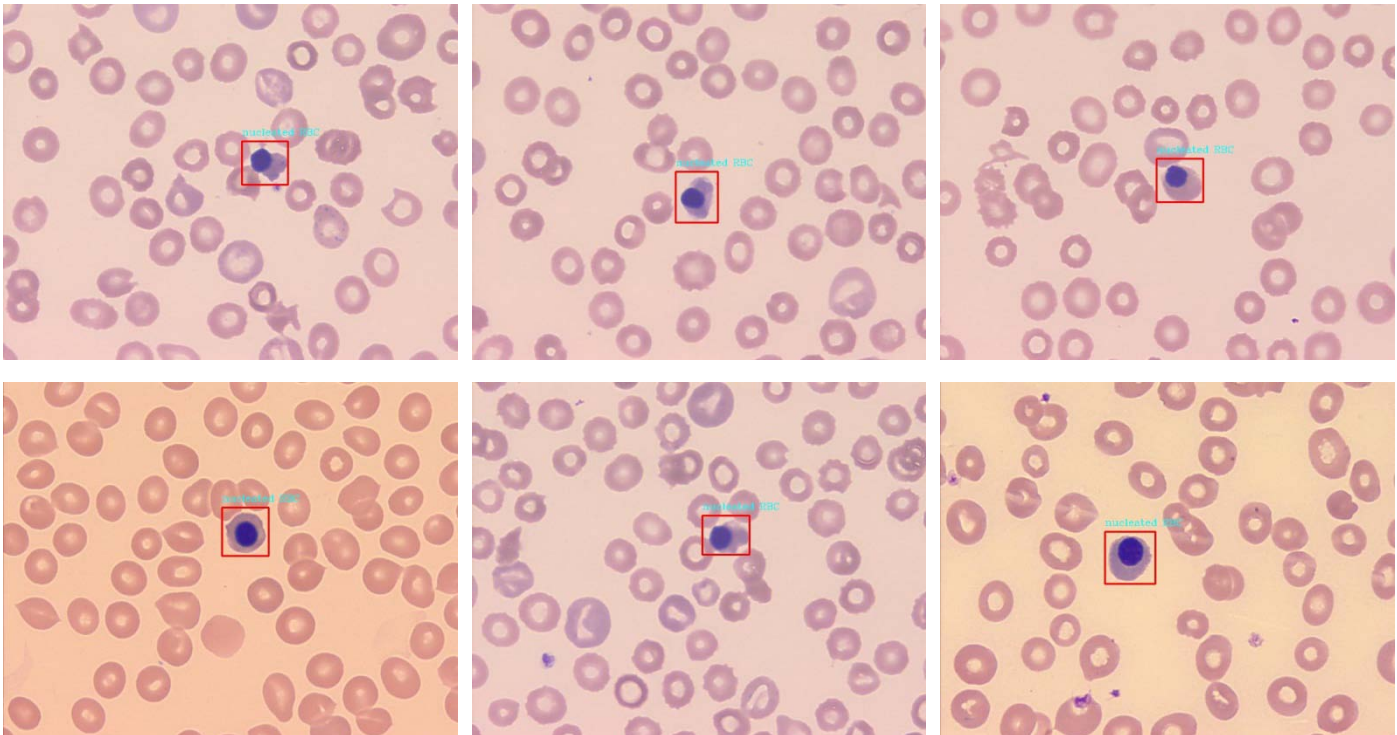

(L) detection results of small cells (NRBC) using SSD300×300\_Smin=0.2 model

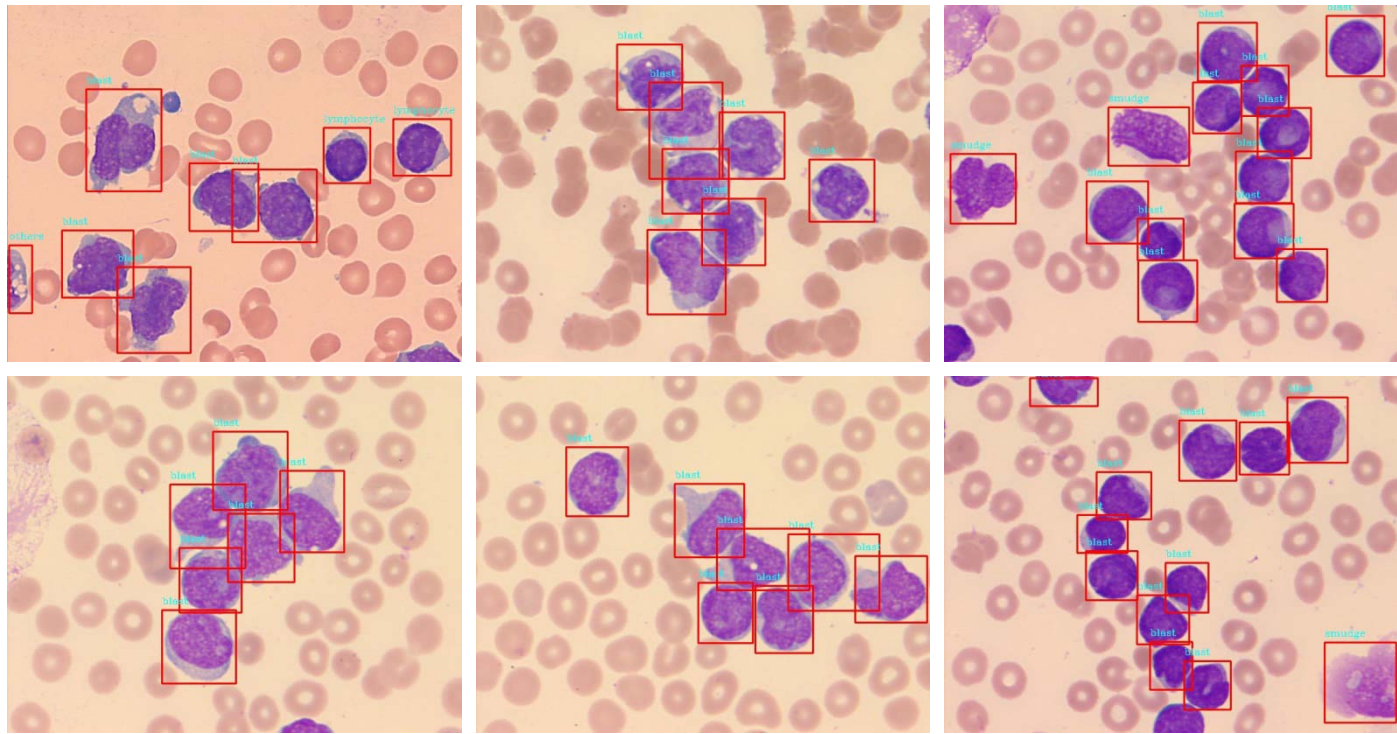

(M) detection results of dense scenes (linked cells) using SSD300×300\_Smin=0.2 model

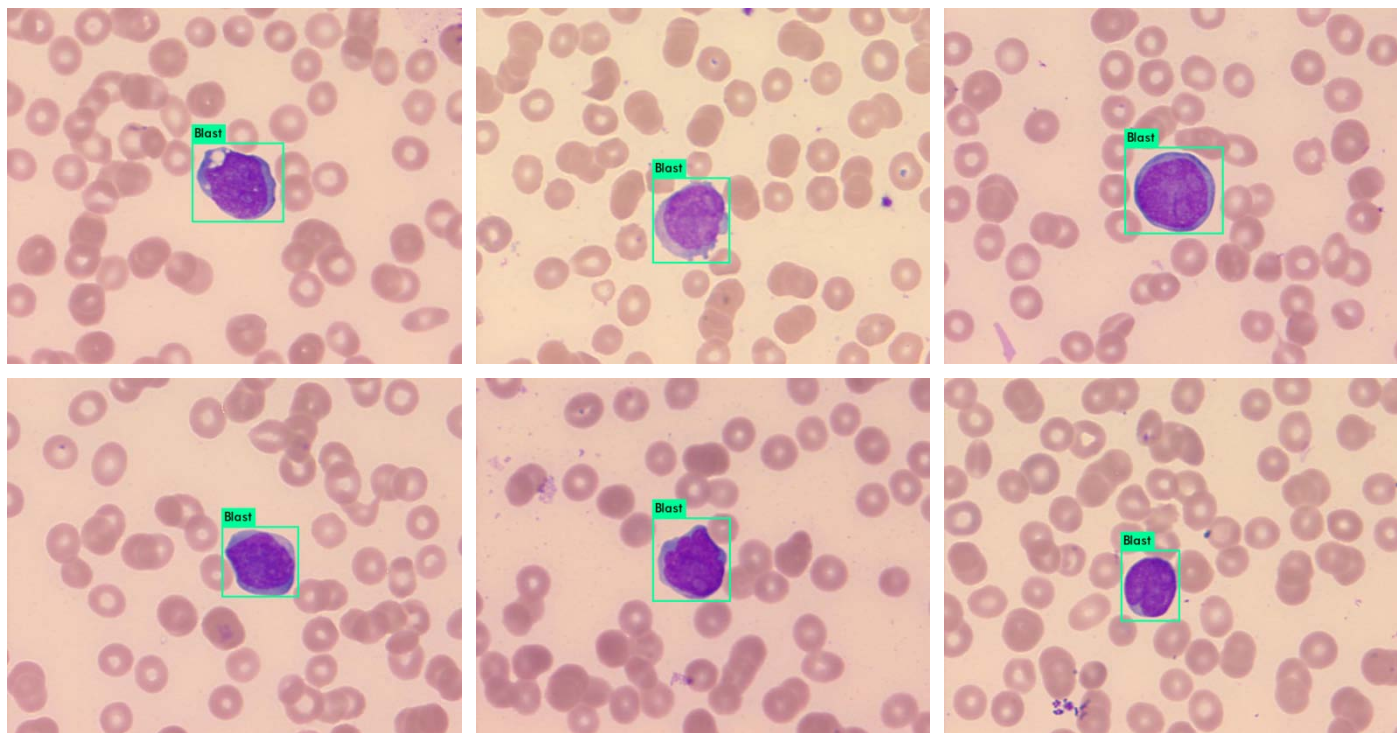

(N) detection results of blast using YOLOv3\_320×320 model

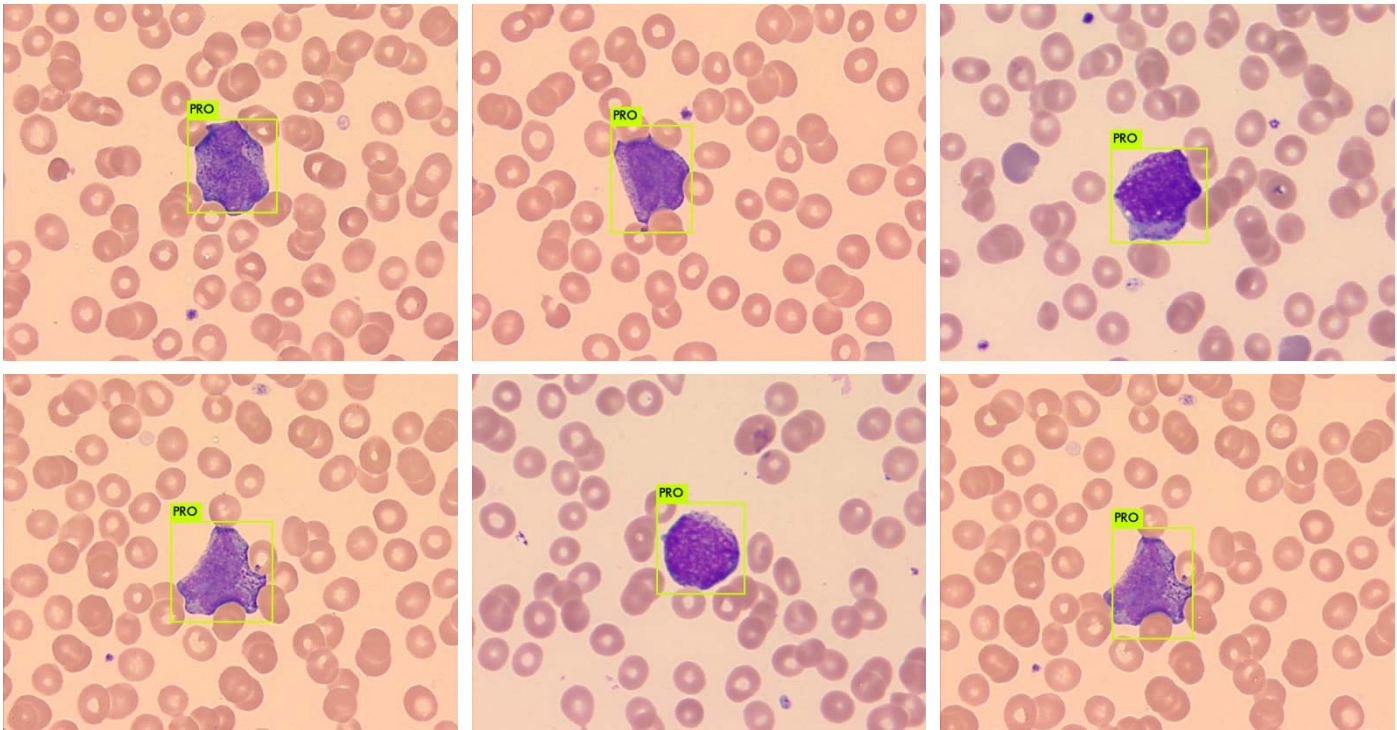

(O) detection results of promyelocyte using YOLOv3\_320x320 model

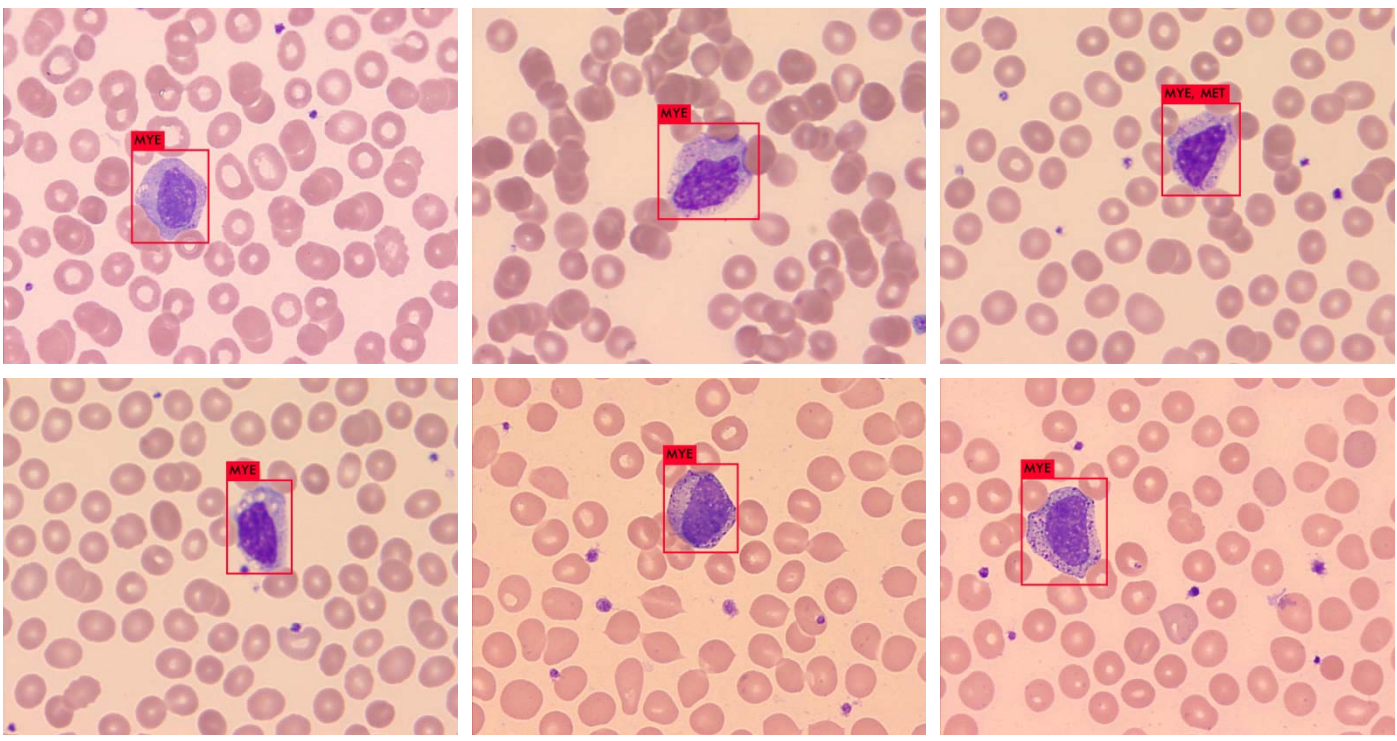

(P) detection results of myelocyte using YOLOv3\_320x320 model



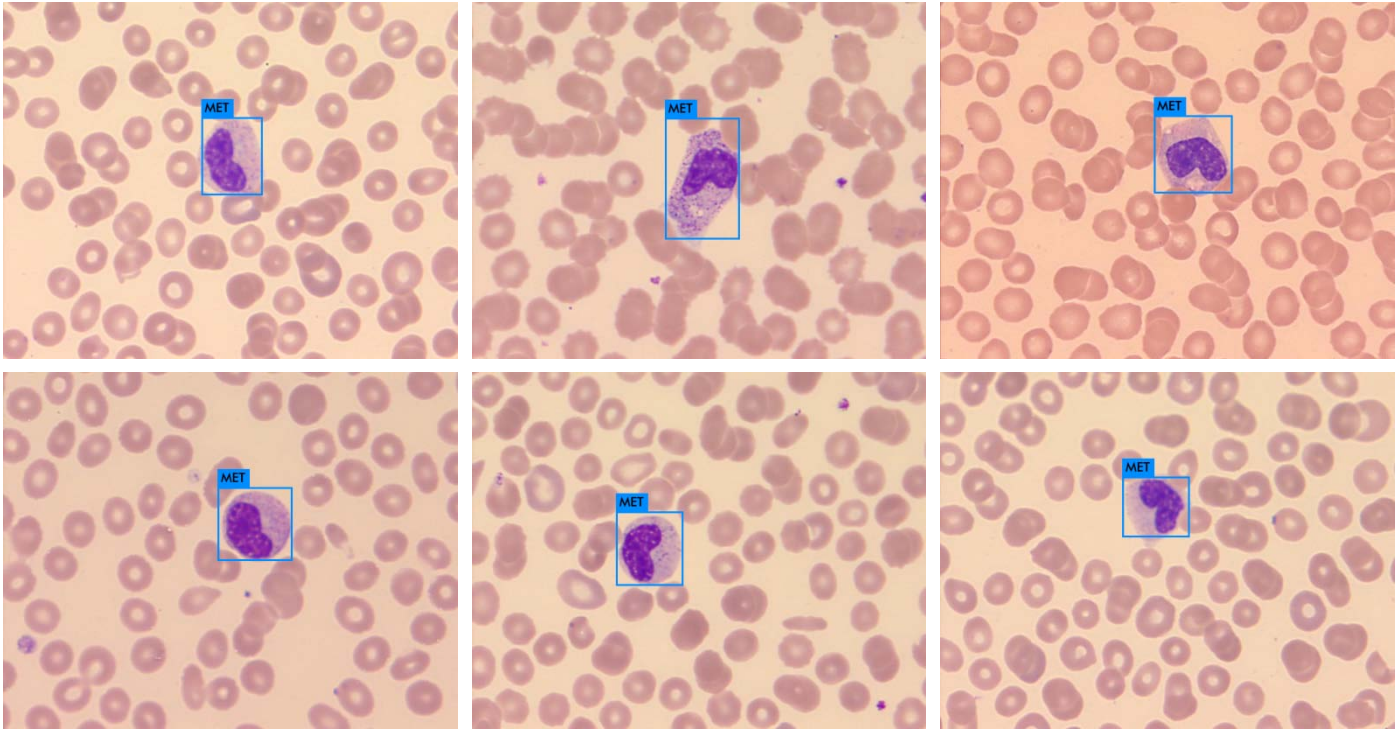

(Q) detection results of metamyelocyte using YOLOv3\_320x320 model

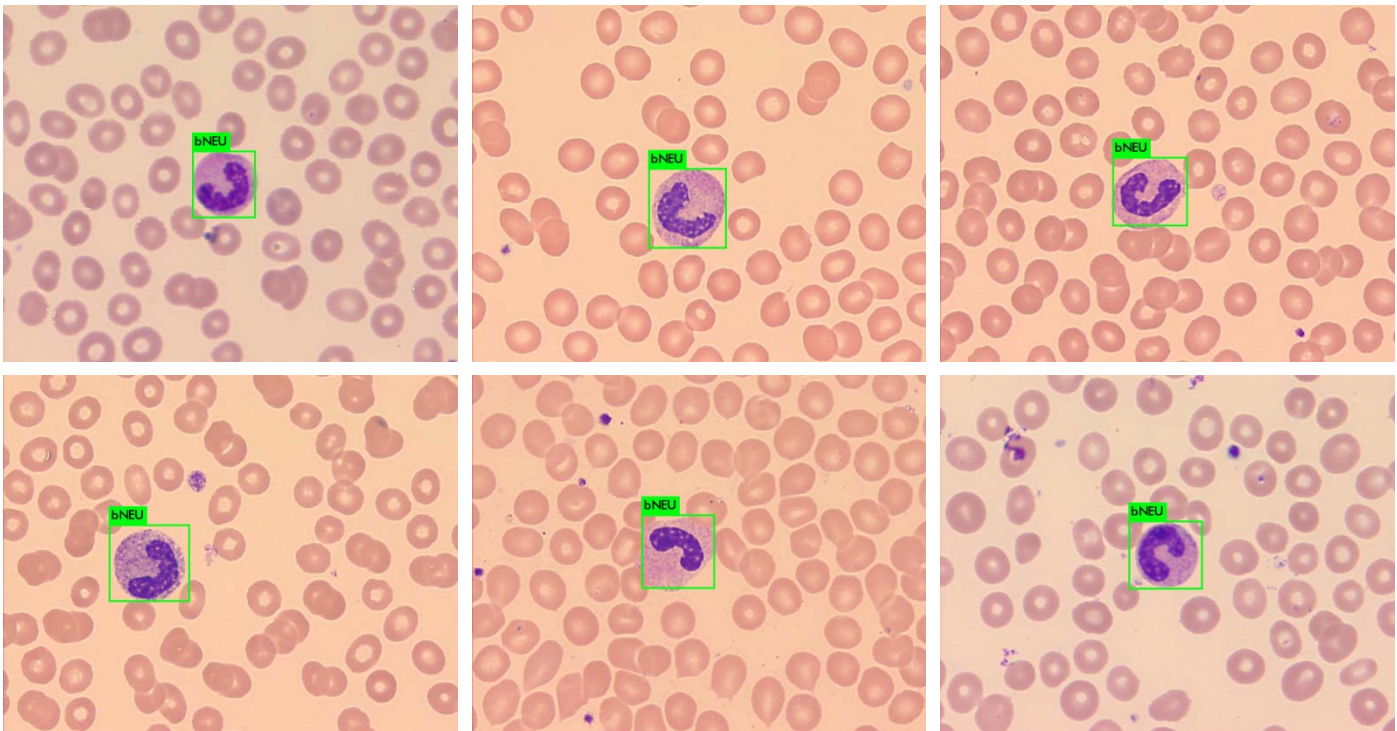

(R) detection results of band neutrophil using YOLOv3\_320x320 model

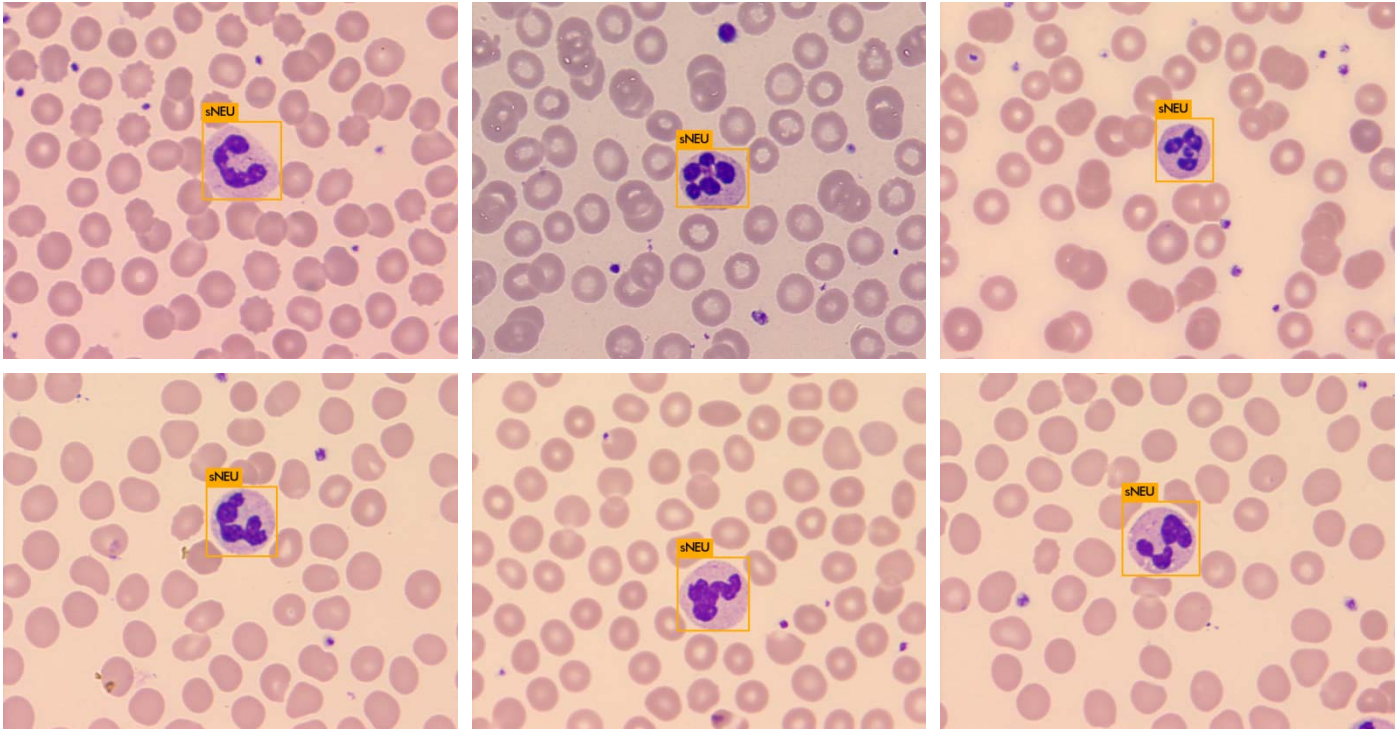

(S) detection results of segmented neutrophil using YOLOv3\_320×320 model

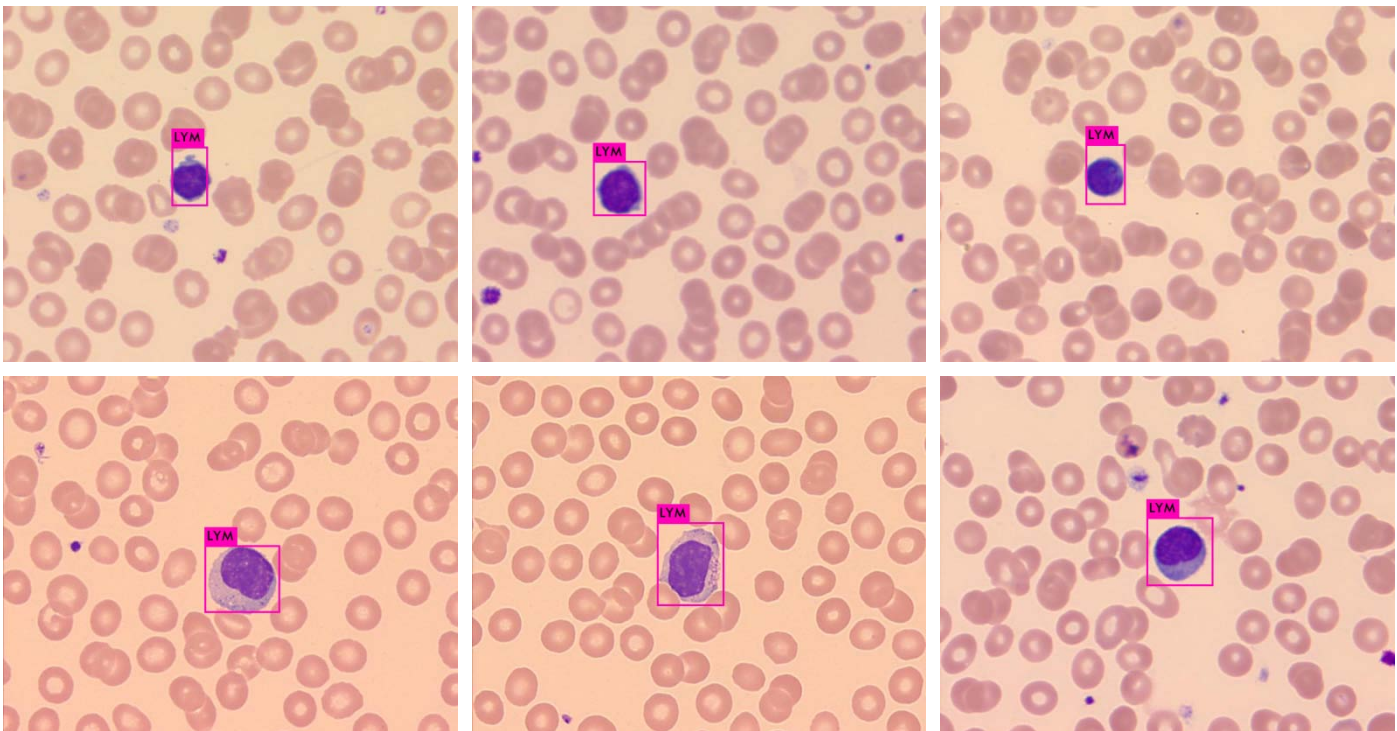

(T) detection results of lymphocyte using YOLOv3\_320×320 model

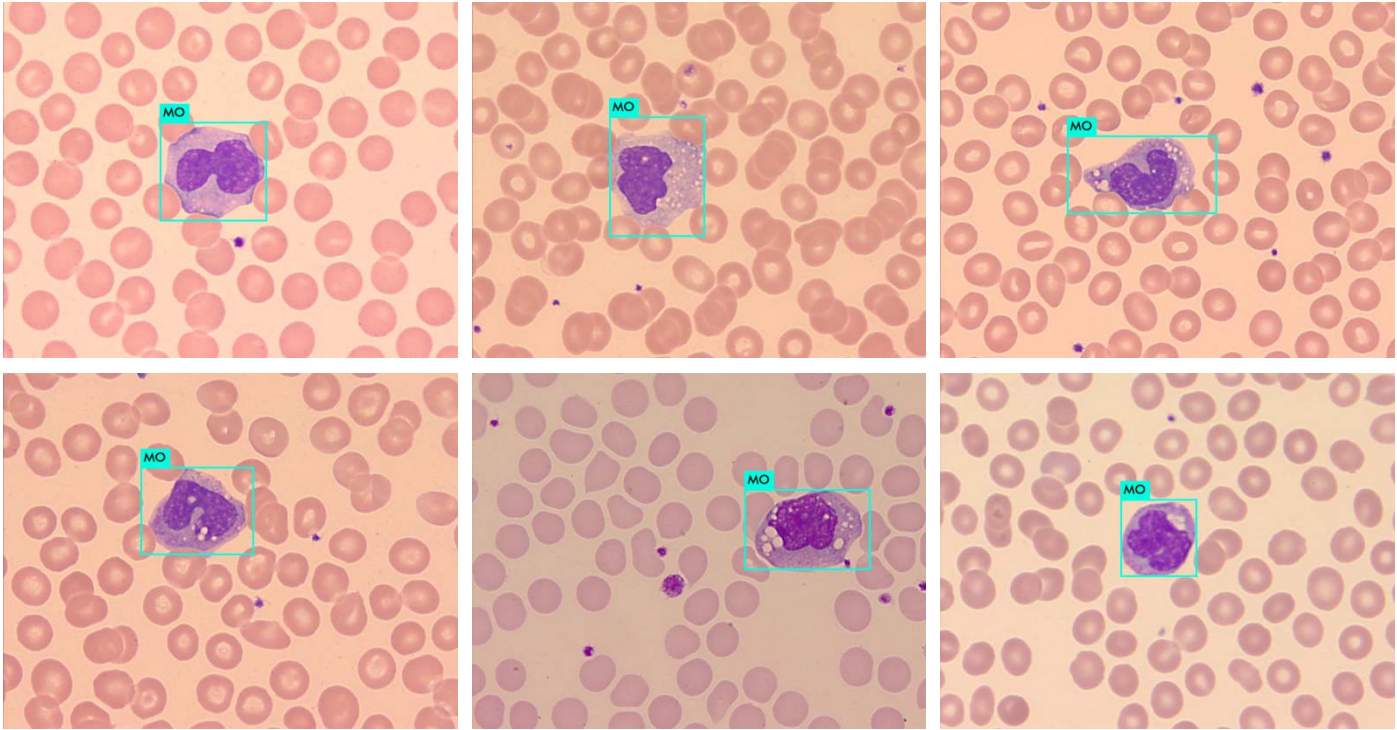

(U) detection results of monocyte using YOLOv3\_320×320 model

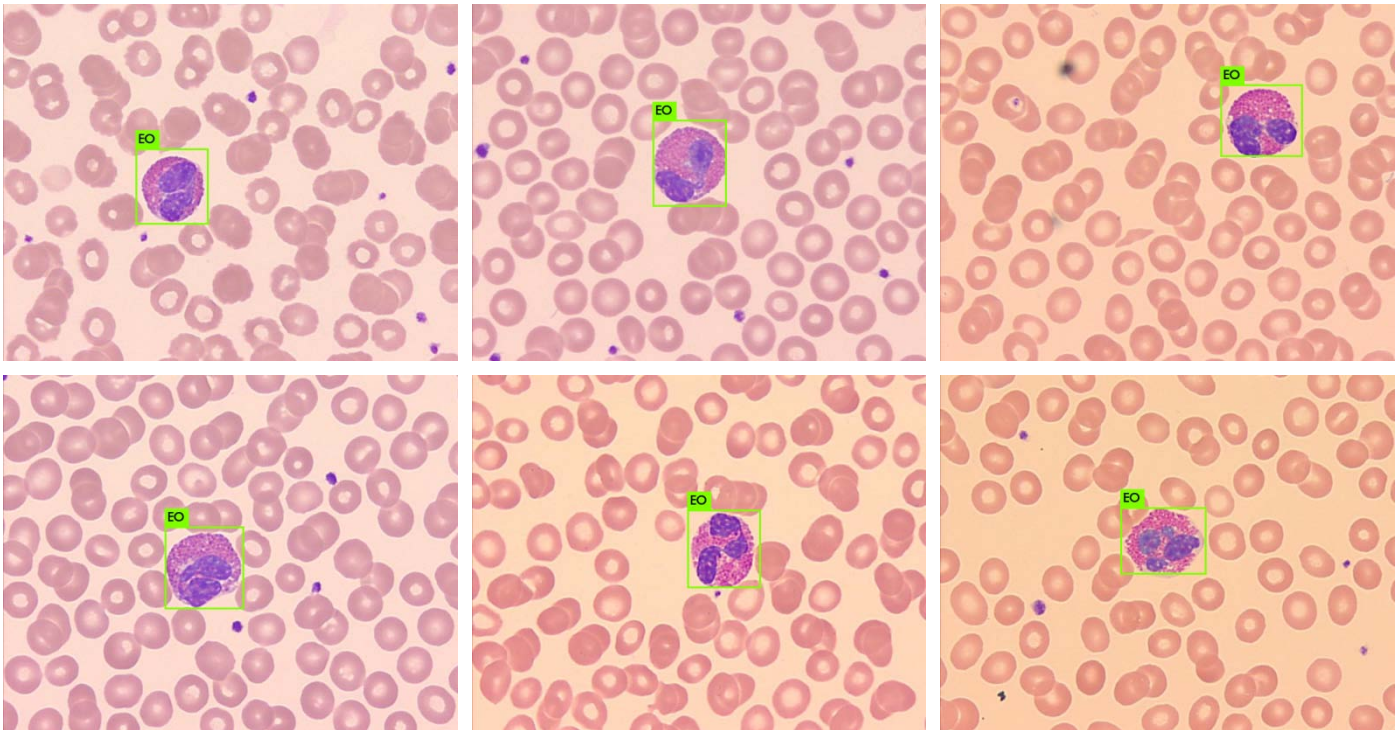

(V) detection results of eosinophil using YOLOv3\_320×320 model

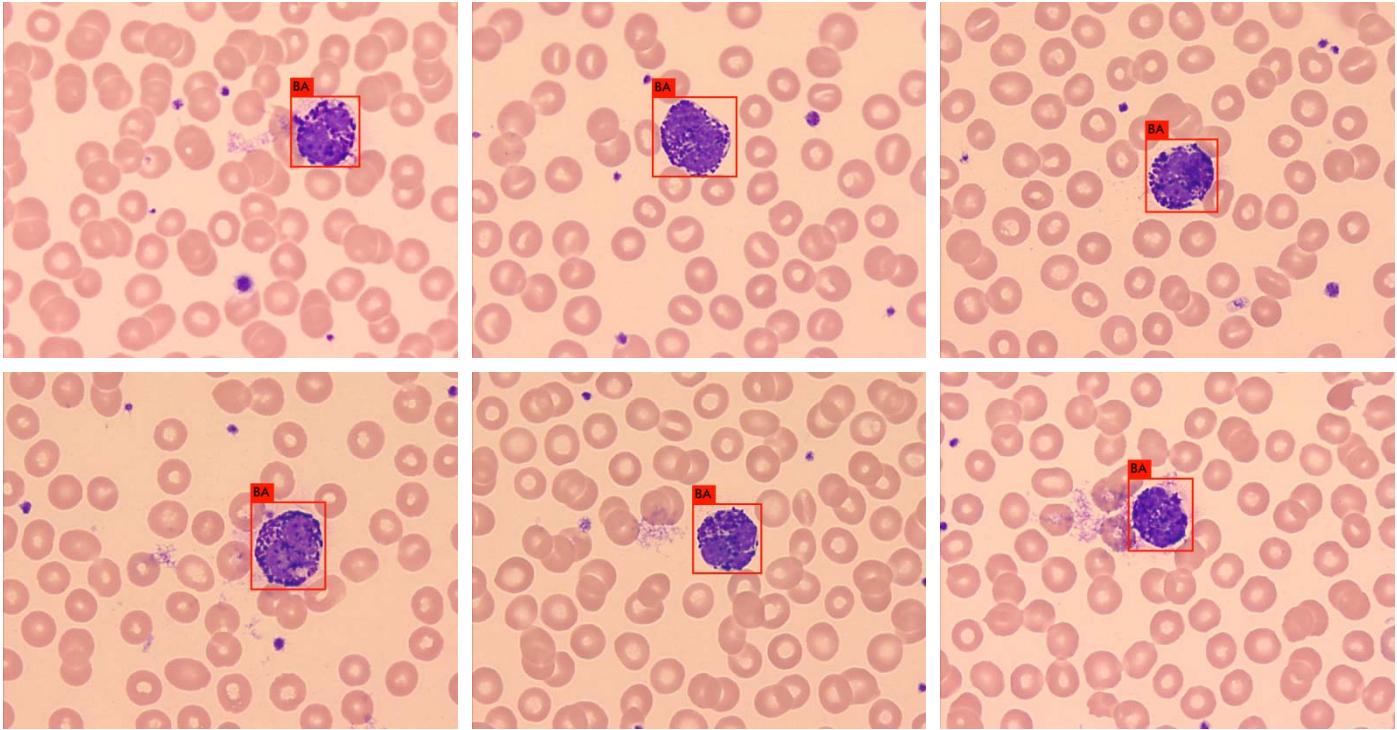

(W) detection results of basophil using YOLOv3\_320×320 model

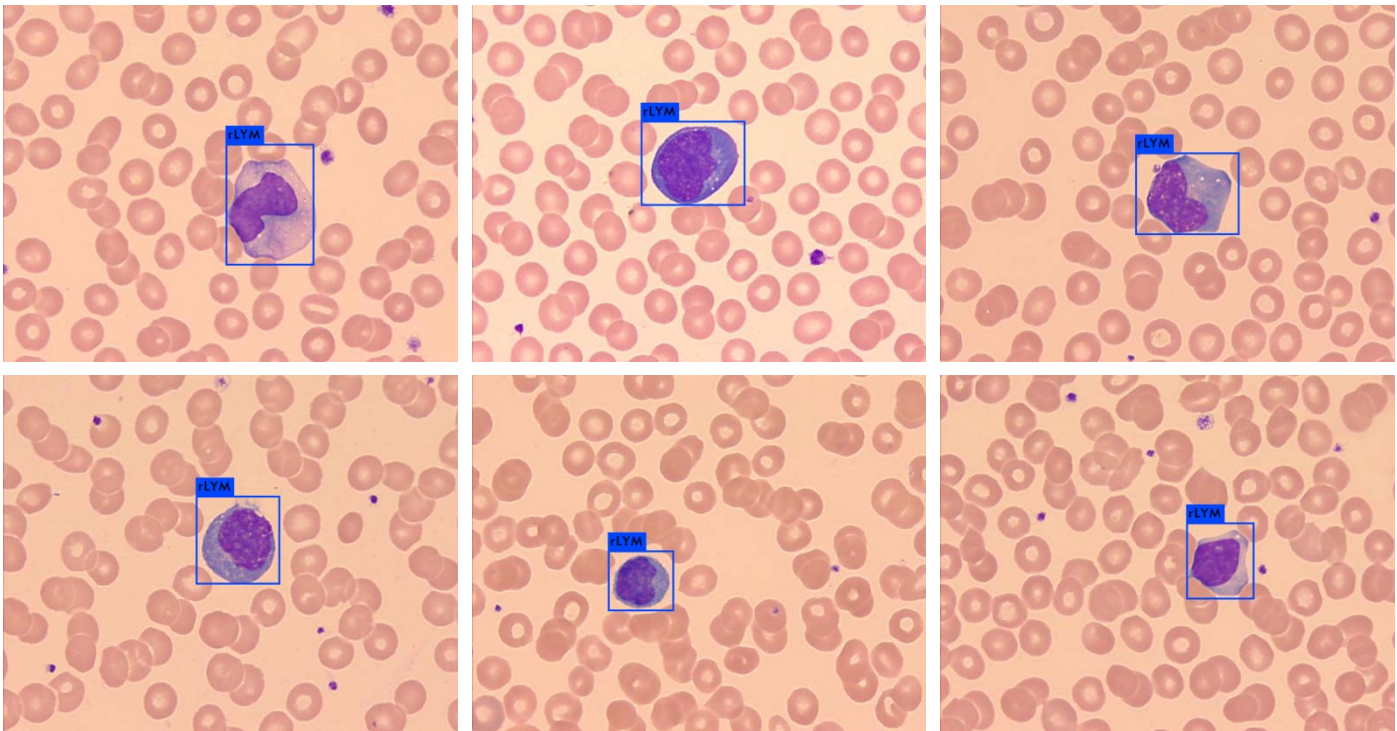

(X) detection results of reactive lymphocyte using YOLOv3\_320×320 model

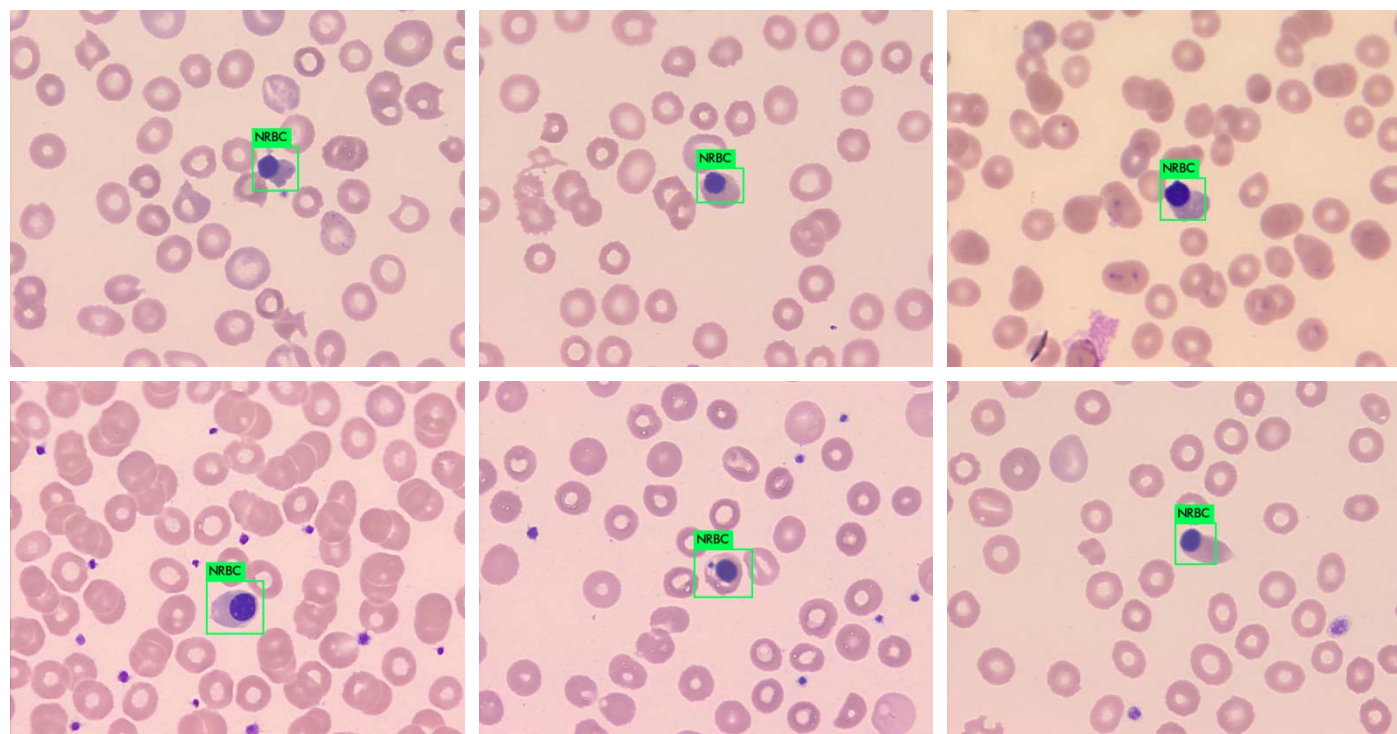

(Y) detection results of small cells (NRBC) using YOLOv3\_320×320 model

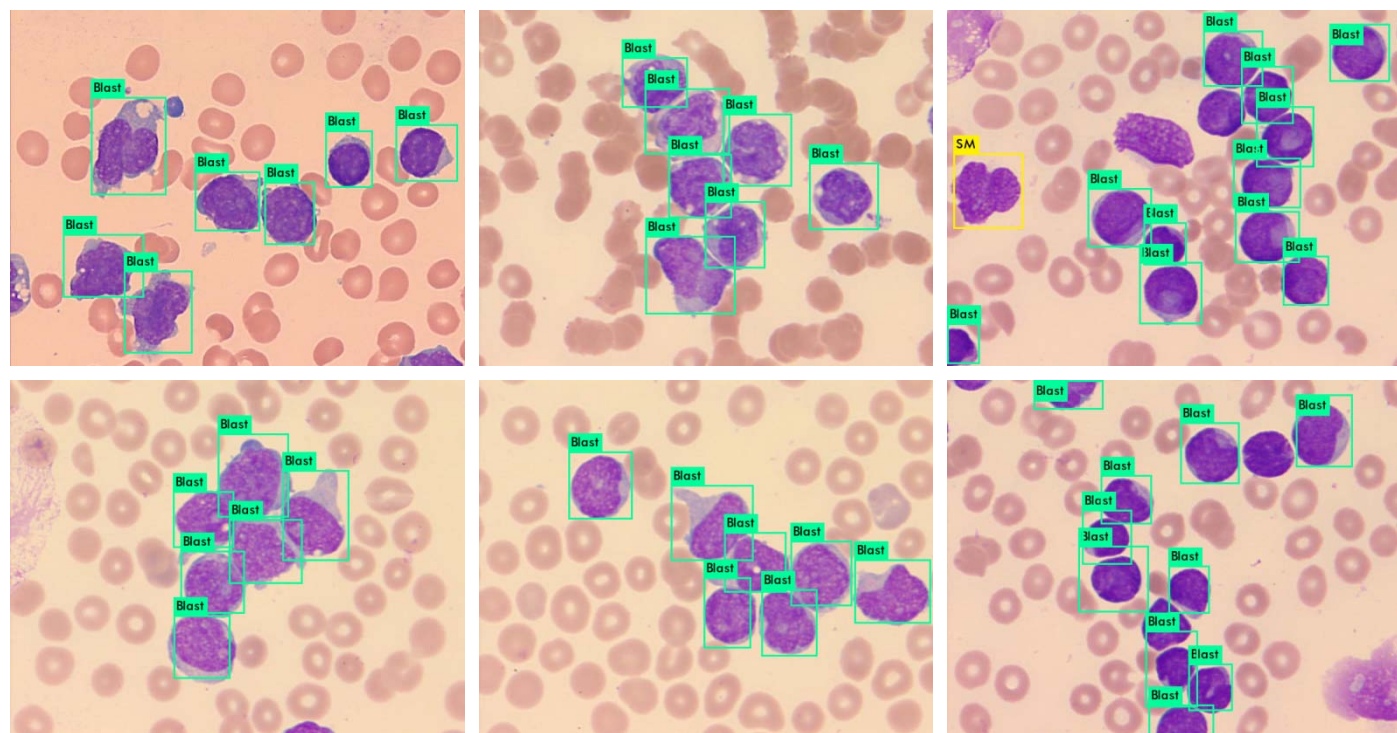

(Z) detection results of dense scenes (linked cells) using YOLOv3\_320×320 model
